# Supplementary material
Source: MDPI journal article supplement (https://www.mdpi.com/2073-4395/11/1/116)

## **Selection of New Late-Season Mandarin Cultivars Based on Sensory Changes and Consumer Acceptance after Fruit Cold Storage**

Paula Tarancón, Adrián Giménez-Sanchis, Pablo Aleza, Cristina Besada

**Figure S1.** External appearance of mandarins at harvest time.

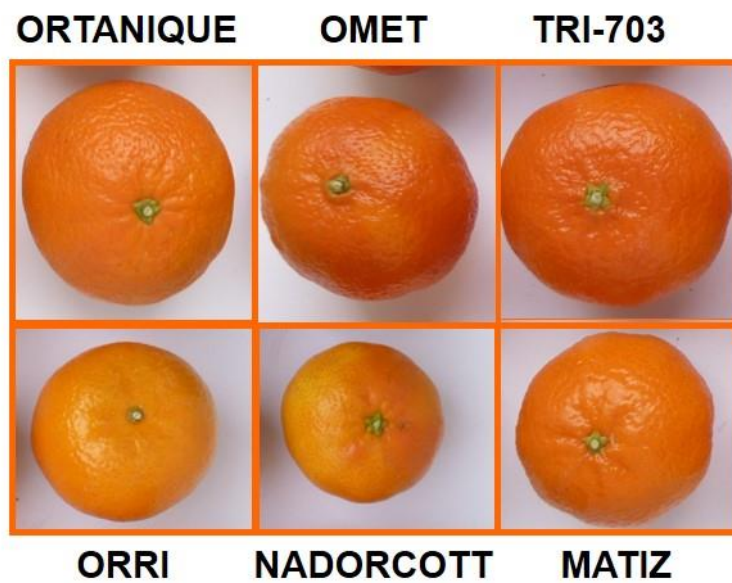

Supplement: s1 [file s1]
